# Supplementary material for: DNA Methylation Pattern in Overweight Women under an Energy-Restricted Diet Supplemented with Fish Oil
Source: Hindawi journal article supplement (doi:10.1155/2014/675021), 2014-01-01
Supplement: f1 [file 675021.f1.pdf]

**Supplementary table 1S.** Genomic sequences analyzed by Sequenom EpiTyper technology and the CpG dinucleotides highlighted.

| Gene                                                                               | Genomic sequence                                                                                                                                                                                                                                                                                                                                                                                                                                                                                                                                                                                                                                                                                                                                                                                                                                                            |
|------------------------------------------------------------------------------------|-----------------------------------------------------------------------------------------------------------------------------------------------------------------------------------------------------------------------------------------------------------------------------------------------------------------------------------------------------------------------------------------------------------------------------------------------------------------------------------------------------------------------------------------------------------------------------------------------------------------------------------------------------------------------------------------------------------------------------------------------------------------------------------------------------------------------------------------------------------------------------|
| <i>CD36</i>                                                                        |                                                                                                                                                                                                                                                                                                                                                                                                                                                                                                                                                                                                                                                                                                                                                                                                                                                                             |
| NC_000007 REGION:<br>80231554..80232032<br>gene ID: 948, updated<br>on 09-02-2012  | <p style="text-align: right;">+95</p> GGGTTGAGAGCCTGTGCCTCATTCTGAGTTCTCAGCTGCTATGC <b>CG</b> TGGAAATCCTGTTTACTTTC<br><p style="text-align: right;">+167</p> TGCATCTGCTCCTGCAAGACTCTGGAGCCAGTCTTGAGGTCCACATCTC <b>CG</b> AAAGCAAGCTCTTCT<br>AGAAGTTGGTGTGAGCAGAATGCTTTTTGTTTAGAAGTGTGGCTATAAATGTCTTTGTAGTTGATGCAC<br>TCTCATCTAGTAAGTAACTATTATTTTTGGGCTCTCTAGAAAGGTAATTATTATCTGATATAATAGT<br>TTAGTCTGTGATGCTTCTTTTAACATATTTGTAAGTTTTAACCAAATGGTTAAAGAAATTTGCTTTT<br>TAACCCTTAAACCTCACATATCCACAAGTCTCTAAATTCATAGGATGCTATGGATTTCTAGTTGCC<br><p style="text-align: center;">+477</p> <p style="text-align: right;">+498</p> TAGTTCATGTCTTTTACTTAGAAAA <b>CG</b> TCAGAAAACCCAAACTTCT <b>CG</b> TGACTTCAAAAAGTGTAAAT<br>TGTACCTGAA                                                                                                                                                 |
| <i>FFAR3</i>                                                                       |                                                                                                                                                                                                                                                                                                                                                                                                                                                                                                                                                                                                                                                                                                                                                                                                                                                                             |
| NC_000019 REGION:<br>35849221..35849605<br>gene ID: 2865, updated<br>on 08-16-2012 | <p style="text-align: right;">-202</p> GGCAAATTGGATAAATGCCATTCTAGAGAAGCAGACAAAATTC AAGTGAAGAAGGGGAGAGGAAG <b>CG</b><br><p style="text-align: center;">-199</p> <p style="text-align: right;">-146</p> <b>GT</b> <b>CG</b> GCTGGGGCCTGCTTAGAGCATCCCAGCTGAGACTGCATGAGGAGGGAGGCC <b>CG</b> CAGTTGTGGA<br><p style="text-align: center;">-96</p> ATTTGTTCCCCTTTTAGCATGCTGACCAGCCCTGGCAA <b>CG</b> GAGCTCAAGGCATCTATGTGCCACTGC<br><p style="text-align: center;">-53</p> <p style="text-align: center;">-42</p> <p style="text-align: right;">-18</p> TCAACAGTGAGTGA <b>CG</b> TCATGGGCA <b>CG</b> GCCAGGTCTTTATCAGTTCTGC <b>CG</b> GATAAATAGCCAACTG<br><p style="text-align: center;">+33</p> CACTAGGTCTGGAGAGACAGCAAGGTGCTGTG <b>CG</b> GCAGAGCATTGGGGTCTCAAAGAAGCAGGTGA<br><p style="text-align: center;">+77</p> GCCTGGGCC <b>CG</b> AGGGGCTGGGTGGAGGAGCACCTTGGTGCTTCTCTGCTG |

---

*CD14*

NC\_000005 REGION:  
140012391..140012819  
(complement)  
gene ID: 929, updated  
on 09-06-2012

GGAGGGAAC TGAATGACATCCCAGGATTACATAAACTGTCAGAGGCAGC **CG**AAGAGTTTACAAGTGT  
+516  
+547 +550 +557 +598  
GAAGCCTGGAAGC **CGGCG**GGTGC **CG**CTGTGTAGGAAAGAAGCTAAAGCACTTCCAGAGCCTGTCC **CGG**  
+613 +625 +654 +658 +660  
AGCTCAGAGGTT **CG**GAAGACTTAT **CG**ACCATGGTGTAGTGTAGGGTCTTGGGGT **CGAA** **CGCG**TGCCAC  
+669 +724 +726 +728  
T **CG**GGAGCCACAGGGGTGGATGGGGCCTCCTAGACCTCTGCTCTCTCCCCAGGAG **CGCGCG**TCCTG  
+755 +765 +773 +779 +801  
CTTGTGCTGCTGCTGCTGCTGC **CG**CTGGTGCA **CG**TCTCTG **CG**ACCA **CG**CCAGAACCTTGTGAGCTGGAC **CG**  
+814 +819 +834 +846 +855  
**G**ATGAAGATTTCC **CG**CTG **CG**TCTGCAACTTCTCC **CG**AACCTCAGCC **CG**ACTGGTCC **CG**AAGCCTTCCAGT  
GTGTGTCTGCAGTAGAGGTGGAGATCC

---

*PDK4*

NC\_000007 REGION:  
95225885..95226284  
(complement)  
gene ID: 5166, updated  
on 08-16-2012

CCCTGCTCTGAGCAAGGACCAATGAGCA **CGCG**GAGTCCAACTCTTGGAAACAGTTTGTGGCCAGGA  
-333 -331  
GTACTTGACATTGAGACAGCCTCC **CG**AGTTGTAACAAGGG **CG**AGCCTGGG **CG**GGACCCAGCCCA **CG**  
-271 -254 -244 -229  
-227 -222 -214 -186  
**CG**ACT **CG**GAGCCC **CG**TCCAAGAGGCTAATCTTAAGCCCA **CG**TTGCCCCAGATACCTGTTTCTGCTT  
-131 -122 -120 -113 -97  
CCTCTTCCCTGTTCTTCCCACCTTTTTTC **CG**TCACAGC **CGCG**GGCAC **CG**GTGCCAGGGCACTC **CG**TG  
-88 -64 -62 -50  
GTCAC **CG**TGCCAGGCCATTCTGTGATGAC **CGCG**GCTGGAGGGG **CG**GAGCCCATAGTTCTTTCTCTGA  
-17 -15 +3 +5  
TCTGATTGG **CGCG**ACCTGGAGTTCAGGA **CGCG**TTTCCAAGTTCAGTGACTCCTCCTGTTTGGGA

---

*FADS1*

NC\_000011 REGION:  
61584453..61584871  
(complement)  
gene ID: 3992, updated  
on 08-25-2012

CTGCAACTTTCAAGGGCTCTCAGGCTGCTACTT **CG**GGCAGCACAATTGG **CG**GCA **CG**AGTGGCAAGC  
-310 -294 -289 -286  
AGGCAGTAGTTTCCAACCCTGGAGGGTCAG **CG**TCTGGAGACCC **CG**GCCAAGGCATCCACAGCCTAAA  
-246 -233  
GATGATGTC **CGCG**AC **CG**CC **CG**GGCAGCCT **CG**TGCA **CG**GAAAACCTCAACCC **CG**GCCC **CG**CCACCC  
-200 -198 -194 -190 -180 -174 -157 -151  
TTCTTG **CG**GCCACCC **CG**CAGCCCTGGCCCTCAGTCCATTCACTCCTGCAG **CGCG**GCCC **CG**CACCCA  
-136 -127 -91 -89 -83  
GGCCTGCACTAGAAC **CG**CTGTTCTTAC **CGCG**GG **CG**CCCCCTGGGAGCCAA **CG**CC **CGCG**ATGCC **CG**CCCT  
-59 -47 -45 -42 -25 -22 -20 -13  
GAC **CG**TCAGGAAGT **CG**AAATC **CG**GG **CG**GG **CG**CCCTTTAGGGAGCC **CGCG**AGGGGG **CGCG**TGTTGGCAGC  
-6 +6 +12 +15 +18 +21 +36 +38 +46 +48  
CCAGCTGTGAGTTGCC
